# Supplementary material for: Occurrence of Strongylid Nematode Parasites on Horse Farms in Berlin and Brandenburg, Germany, With High Seroprevalence of Strongylus vulgaris Infection
Source: Frontiers journal article supplement (doi:10.3389/fvets.2022.892920), 2022-06-10
Supplement: Data_Sheet_1.PDF [file Data_Sheet_1.PDF]

## Supplementary Material

### Article

## Occurrence of strongylid nematode parasites on horse farms in Berlin and Brandenburg, Germany with high seroprevalence of *Strongylus vulgaris*

**Questionnaire S1.** Questionnaire to obtain information regarding treatment history and management on the horse farms.

### I . Horse keeping

1. Farm type:

- ☐ Riding stable (less than 2 foals, more than 15 horses)
- ☐ Small farm (less than 2 foals, less than 15 horses)
- ☐ Stud farm (more than 2 foals)

2. Total number of horses:.....

3. Age of horses: Quantity

Foals (under 1 year):.....

Yearlings (1-3 years):.....

Adults (over 3 years):.....

4. Horse accomodation:

- ☐ Open stable
- ☐ Box
- ☐ Group Box
- ☐ other

### II . Pasture management

1. Do the horses have access to the pasture? ☐yes ☐no

How often?

- ☐ year around

☐ only in summer

☐ full day

☐ a few hours

2. How many hectares of pasture are used per horse? .....

3. Are pastures regularly changed? ☐ yes ☐ no

If yes, at what intervals? .....

After anthelmintic treatment? ☐ yes ☐ no

4. Do you feed fresh (chopped) grass? ☐ yes ☐ no

### III. Hygiene – Stable and pasture

1. How often do you clean the stables? .....

2. Do you disinfect your stable annually? ☐ yes ☐ no

3. If yes, what disinfectant is used? .....

4. Is cleaning or disinfection carried out after deworming?

☐ yes ☐ no

5. Do you collect faeces from the pastures? ☐ yes ☐ no

How often? .....

6. Do you use hay racks? ☐ yes ☐ no

### IV. Anthelmintic management

1. Are horses dewormed at regular intervals? ☐ yes ☐ no

Do all horses receive anthelmintic treatment at the same time? ☐ yes ☐ no

Date of the last anthelmintic treatment: .....

Which drug was used?

foals: .....

yearlings: .....

adults: .....

breeding mares: .....

2. How often is anthelmintic treatment given?: .....

3. Do you change the drug classes regularly?

☐yes ☐no

How often?.....

4. Are new horses dewormed before arrival at the farm? ☐yes ☐no

5. Do you follow an evidence-based selective deworming approach based on faecal egg counting?

☐yes ☐no

Which faecal egg count is the limit above which the horses are treated?

6. Do you monitor the success of the anthelmintic treatment using faecal samples?

☐yes ☐no

7. Please describe the anthelmintic management: .....

.....

Many thanks

Jürgenschellert, L., Krücken, J., Austin, C.J., Lightbody, K.L., Bousquet, E., von Samson-Himmelstjerna, G., 2020. Investigations on the occurrence of tapeworm infections in German horse populations with comparison of different antibody detection methods based on saliva and serum samples. *Parasites & Vectors* 13, 1-10.

**Supplementary Table 1** | Primers used for diagnosis of *Strongylus* spp.

| Sequence (5' - 3')           | Name                                                              | Target species                                                                         |
|------------------------------|-------------------------------------------------------------------|----------------------------------------------------------------------------------------|
| TATACATTAAATAGTGTCCCCATTCTAG | <i>S_vulgaris_for</i><br>(modified based<br>on Nielsen<br>(2008)) | <i>Strongylus vulgaris</i>                                                             |
| GCAAATATCATTAGATTTGATTCTTCCG | <i>S_vulgaris_rev</i><br>(Nielsen (2008))                         | <i>Strongylus vulgaris</i>                                                             |
| AATCCCCATTCTAGAAAAGAAT       | S.eden:equi.asin.<br>HRM.for                                      | <i>Strongylus edentatus</i> ,<br><i>Strongylus equinus</i> ,<br><i>Strongylus asni</i> |
| ATAAGTCGGTAAACAATTTAGC       | S.eden:equi.asin.<br>HRM.for                                      | <i>Strongylus edentatus</i> ,<br><i>Strongylus equinus</i> ,<br><i>Strongylus asni</i> |

**Supplementary Table 2** | Primers for pyrosequencing assays for *Strongylus vulgaris* isotype 1  $\beta$ -tubulin gene

| Sequence (5' to 3')             | Name                     |
|---------------------------------|--------------------------|
| CGGGTATGGGAAGCTCTCCTTA          | Sv_betaT_Iso1_167_F1     |
| CGTGTTCCATTCCCAAGAACT           | Sv_betaT_Iso1_167_R1     |
| Biotin-CGTGTTCCATTCCCAAGAACT    | Sv_bT_Iso1_167_P_R1      |
| TGATAGAATCATGTCTTCGT            | SvbTIso1_167S            |
| TTTTTCTAGGTTTCCGACACTGT         | Sv_betaT_Iso1_198_200_F1 |
| AAGGTACGGAAGCAAATATCATAC        | Sv_betaT_Iso1_198_200_R1 |
| Biotin-AAGGTACGGAAGCAAATATCATAC | Sv_bT_Iso1_198_200_P_R1  |
| GCTAGTTGAAAATACAGATG            | SvbTIso1_198_200S        |
| TTGATTGCTAAAATCCGAGAAGAG        | Sv_betaT_Iso2_167_F1     |
| CATAGAGTCCAAGCGTGCATTA          | Sv_betaT_Iso2_167_R1     |
| CCCTTTGTAATCGGATATTGCA          | Sv_betaT_Iso2_198_200_F1 |
| AAAGTTCGGAAGCAGATGTCGTA         | Sv_betaT_Iso2_198_200_R1 |
